1 **Low Dose Lead Exposure Induces Alterations on Heterochromatin Hallmarks**

2 **Persisting Through SH-SY5Y Cell Differentiation**

3 Li Lin<sup>1,#</sup>, Junkai Xie<sup>1</sup>, Oscar F. Sanchez<sup>2</sup>, Chris Bryan<sup>3</sup>, Jennifer Freeman<sup>4</sup>, Chongli Yuan<sup>1,</sup>

4 <sup>5 \*</sup>

5 1. Davidson School of Chemical Engineering, Purdue University, West Lafayette, IN 47907,

6 USA

7 2. Department of Nutrition and Biochemistry, Pontificia Universidad Javeriana, Bogotá,

8 110231, Colombia

9 3. Department of Statistics, Purdue University, West Lafayette, IN, 47907, USA

10 4. School of Health Science, Purdue University, West Lafayette, IN 47907, USA

11 5. Purdue University Center for Cancer Research, West Lafayette, IN, 47907, USA

12

13

14

15 #: Current Address: Department of Chemical and Biomolecular Engineering, University of

16 California, Berkeley, CA 94704,USA

17 \* To whom correspondence should be addressed. Tel: + 1 765 494 5824; Fax: + 1 765 494

18 0805; Email: [cyuan@purdue.edu](mailto:cyuan@purdue.edu)

19

20

21

22 The authors declare they have no actual or potential competing financial interests.

23

24 **ABSTRACT**

25       Lead (Pb) is a commonly found heavy metal due to its historical applications. Recent  
26 studies have associated the early-life Pb exposure with the onset of various neurodegenerative  
27 disease. The molecular mechanisms of Pb conferring long-term neurotoxicity, however, is yet  
28 to be elucidated. In this study, we explored the persistency of alteration in epigenetic marks  
29 that arise from exposure to low dose of Pb using a combination of image-based and gene  
30 expression analysis. Using SH-SY5Y as a model cell line, we observed significant alterations  
31 in global 5-methylcytosine (5mC) and histone 3 lysine 27 tri-methylation (H3K27me3) and  
32 histone 3 lysine 9 tri-methylation (H3K9me3) levels in a dose-dependent manner  
33 immediately after Pb exposure. The changes are partially associated with alterations in  
34 epigenetic enzyme expression levels. Long term culturing (14 days) after cease of exposure  
35 revealed persistent changes in 5mC, partial recovery in H3K9me3 and overcompensation in  
36 H3K27me3 levels. The observed alterations in H3K9me3 and H3K27me3 are reversed after  
37 neuronal differentiation, while reduction in 5mC levels are amplified with significant changes  
38 in patterns as identified via texture clustering analysis. Moreover, correlation analysis  
39 demonstrates a strong positive correlation between trends of 5mC alteration after  
40 differentiation and neuronal morphology. Collectively, our results suggest that exposure to  
41 low dose of Pb prior to differentiation can result in persistent epigenome alterations that can  
42 potentially be responsible for observed phenotypic changes.

43

44 **Keywords:** Lead exposure, 5mC, H3K9me3, H3K27me3, epigenetic persistence

45

## 46 1. INTRODUCTION

47 Lead (Pb) is a heavy metal historically used for various applications, i.e., painting,  
48 ceramic glazing, pipe soldering, and gasolines (Nriagu, 1990; Wilson and Horrocks, 2008)  
49 and is thus found in soil and water sources due to its historical uses (Annest et al., 1983). A  
50 survey conducted in late 1970s suggested that ~ 78% of the population then has blood lead  
51 levels (BLLs) of 10 µg/dL (100 parts per billion, ppb) or higher; and this percentage is even  
52 higher in children (1-5 years old) with an estimated percentage of 88% (Dignam et al., 2019).  
53 Usage of Pb has thus been tightly regulated by environmental protection agencies. High Pb  
54 levels exceeding the regulatory standard, however, are often reported in many geographic  
55 locations due to legacy uses. Human exposure to Pb can primarily be attributed to ingestion  
56 of contaminated food (~ 59 – 81% of total Pb exposure cases(Watanabe et al., 2000)) or water  
57 (~20% of total (Jarvis et al., 2018)).

58 Pb exposure can happen at different life stages. Among them, developmental exposure to  
59 Pb is often associated with more detrimental health outcomes, including severe damages in  
60 central nervous system (Nevin, 2000, 2007) and thus has attracted significant attention in  
61 recent years. Specifically, children with prenatal Pb exposure (> 100 ppb) exhibited delayed  
62 cognitive development (Bellinger et al., 1987), while children exposed to Pb at young ages  
63 show severe impairment in their cognitive functions and often poor academic  
64 performances(Cecil et al., 2008b). Interestingly, post-natal exposure to equivalent  
65 concentrations of Pb seems to cause more significant damages than prenatal exposure  
66 (Bellinger et al., 1987; Bellinger et al., 1992; Lanphear et al., 2000). Pathologically, exposure  
67 to Pb during childhood (< 6.5 years old) can cause significant changes in brains at adulthood

68 (19 – 24 years old) including alterations in brain volume, architecture and metabolism(Cecil  
69 et al., 2008a) (Cecil et al., 2011). Recent studies have further associated early-life Pb  
70 exposure to various neurodegenerative disorders, such as Alzheimer’s disease (AD) (Eid et al.,  
71 2016; Bihagi et al., 2017) and Parkinson’s disease (PD) (Weisskopf et al., 2010; Caudle et al.,  
72 2012) aligning with the Developmental Origins of Health and Disease (DOHaD) paradigm.  
73 Collectively, these results have led to the recent revision of action doses of Pb in drinking  
74 water from 50 to 15 ppb by the U.S. Environmental Protection Agencies.

75 The neurotoxicity of Pb, in the form of  $Pb^{2+}$ , partially arises from its resemblance to other  
76 cations essential for neuron activities, such as Ca ( $Ca^{2+}$ ) and Na ( $Na^{+}$ ) (Needleman, 2004).  
77 Specifically, Pb competes with Ca in neuronal signaling pathways (Flora et al., 2012;  
78 Meissner, 2017) and can disrupt the excitatory and inhibitory synaptic transmission balance  
79 in hippocampal neurons(Zou et al., 2020). Pb can also interfere with Na uptake and  
80 subsequently affect neuron firing(Yan et al., 2008). The long-term health implications of Pb  
81 exposure, particularly increased risk for AD and PD (Coon et al., 2006; Mansouri and Cauli,  
82 2009; Weisskopf et al., 2010; Caudle et al., 2012; Eid et al., 2016; Bihagi et al., 2017),  
83 however, cannot be fully explained by such a mechanism. Moreover, Pb exposure is shown to  
84 have transgenerational effects in altering brain transcriptome by a recent zebrafish  
85 study(Meyer et al., 2020) suggesting the involvement of epigenetic mechanism accounting  
86 for low mutagenic activities of Pb at low doses.

87 Recent studies have been associating exposure to Pb with epigenome changes. For  
88 example, developmental Pb exposure in mice can cause expression changes in DNA  
89 methyltransferase 1 (DNMT1), DNA CpG methylation ( $^{me}CpG$ ) and other histone

90 modification levels, including H3K9ac, H3K4me2 and H3K27me3(Eid et al., 2016). Similar  
91 observations were also made in rats (Singh et al., 2018a). Pb can also affect the activities of  
92 epigenetic enzymes, i.e., DNMTs as shown in our previous study (Sanchez et al., 2017). Few  
93 studies exist, however, assessing the persistence of Pb-induced epigenetic changes over time.  
94 It thus remains elusive as to how epigenetic changes induced by Pb exposure can persist  
95 through the developmental stage and confer long-term health risks after the cessation of  
96 exposure to Pb.

97 Here, we worked with SH-SY5Y cell line, a model human neuroblastoma cell line  
98 capable of differentiating into neurons (Xicoy et al., 2017) to examine epigenetic changes  
99 induced by exposure to Pb that potentially persist after the cessation of exposure. Exposure to  
100 low doses of Pb (15 and 50 ppb) prior to differentiation is found to induce significant changes  
101 in the percentage of mature neurons as well as neurite lengths. Significant epigenetic changes  
102 were observed right after Pb exposure potentially attributing to expression changes in  
103 epigenetic enzyme. Changes in 5mC levels persist after cessation of exposure and amplifies  
104 through neuronal differentiation, suggesting a potential correlation with the observed  
105 nonlinear dose- dependence of phenotypical alteration.

106

## 107 **2. MATERIAL AND METHODS**

### 108 ***2.1 Culture and differentiation of SH-SY5Y:***

109 SH-SY5Y (ATCC, CRL-2266) was cultured following the standard protocol recommended  
110 by the manufacturer. Specifically, cells were maintained in Eagle's Minimum Essential  
111 Medium (Gibco, U.S.) supplemented with 10% (v/v) fetal bovine serum (Atlanta Bio, U.S.),

112 1% of Penicillin-Streptomycin and 1% of MEM Non-Essential Amino Acids (Gibco, U.S.).

113 Cells were passed in T25 flasks at 37 °C with 5% CO<sub>2</sub>.

114 SH-SY5Y differentiation was carried out following a protocol adapted from literature  
115 (Shiple et al., 2016) (see also **Fig.1A**). Briefly, differentiation was started on Day 0 by an  
116 exchange of culture medium, proceeded to Day 6 with a second medium exchange and  
117 completed on Day 14. Compositions of differentiation medium can be found in **Table S1**  
118 (Supplementary information). The completion of differentiation was confirmed by staining  
119 cells with MAP2-antibody (PA5-17646, Invitrogen, U.S.) that are specific for mature  
120 neurons.

121

## 122 ***2.2 Selection of Pb concentrations and treatment:***

123 Pb stock solutions were prepared as described previously(Lee et al., 2017) and spiked into  
124 cell culture medium at selected concentrations. We have chosen Pb concentrations of 15 and  
125 50 ppb in this work based on the past and current EPA regulation standard on drinking water  
126 (50 and 15 ppb, respectively)(2007). Pb concentrations higher than 15 ppb have also been  
127 reported in recent public health incidence (e.g., 16.5-33.2 µg L<sup>-1</sup> (ppb) (Pieper et al., 2018)).

128 All cells were treated with Pb of 0, 15 and 50 ppb for 96 hours prior to differentiation  
129 (see also **Fig.1A**) or continuous culturing. All cells were washed three times in PBS prior to  
130 the initiation of differentiation or continuous culturing.

131

## 132 ***2.3 Cell viability and morphological assessments:***

133 Cell viability was assessed using a colorimetric MTT assay (ab211091, Abcam, U.S.).

134 Nuclear size and morphology were determined by first staining cell nucleus with Draq5  
135 (Thermo Fisher, U.S.) followed by imaging using fluorescent microscopy (Nikon, Japan).  
136 Individual nucleus was identified using a customized CellProfiler (Broad Institute, U.S.)  
137 pipeline as we detailed in our previous work(Sánchez et al., 2020).

138 Neurite length was determined via cell images collected using a bright-field microscope  
139 (Fluoid, Life Technologies) and quantified via the Simple Neurite Tracing plugin in FIJI (NIH,  
140 U.S.) (Fanti et al., 2008). Specifically, the length of the longest bifurcation branch of each  
141 neuron was measured to characterize the neurite length of each neuron.

142

#### 143 ***2.4 Immunostaining***

144 To characterize the completion of differentiation, all differentiated cells were fixed with 4%  
145 paraformaldehyde (Thermo Fisher, U.S.) followed by permeabilization overnight in 1%  
146 Triton-X (Sigma, U.S.). Cells were then stained with anti-MAP2 antibody (1: 200 dilution,  
147 PA5-17646, Invitrogen) at 4 °C overnight followed by staining with a secondary  
148 goat-anti-rabbit antibody coupled with Alexa 568 (ab175471, Abcam, US).

149 Immunostaining for selected epigenetic modifications, namely 5mC, H3K9me3 and  
150 H3K27me3, was carried out following a similar protocol as described above. An additional  
151 denaturation step was included for 5mC staining, in which the cells are treated with 4N HCl  
152 for 30 minutes and equilibrated with 100mM Tris-HCl (pH 8.5) for 10 minutes. 5mC (61479,  
153 Active Motif, U.S.), H3K9me3 (ab8898, Abcam, U.S.) and H3K27me3 (ab192985, Abcam,  
154 U.S.) antibodies were used as primary. Goat-anti-mouse coupled with Alexa 488 (R37120,  
155 Thermo Fisher, U.S.) and Goat-anti-rabbit coupled with Alexa 568 (ab175471, Abcam, US)

156 were used as secondary antibodies for 5mC and histone modifications, respectively.

157

## 158 *2.5 Fluorescent microscopy*

159 All fluorescent images were collected using a Nikon Eclipse Ti-2 inverted microscope. A 60  
160  $\times$ /1.40 NA oil objective was used for all images. Z-stack of cells were collected using Nikon  
161 EZ-C1 software with an interval of 1  $\mu$ m. 2D max projections were created with ImageJ as  
162 we described previously(Sánchez et al., 2019; Sánchez et al., 2020). All images were then  
163 analyzed using a customized Cell Profiler pipeline similar as we described in our previous  
164 publication(Sánchez et al., 2020).

165

## 166 *2.6 Gene expression analysis via RT-qPCR*

167 Pellets of SH-SY5Y cells were collected immediately after completion of Pb treatments (96  
168 hrs.) to determine changes in key epigenetic enzymes, namely DNMT1, DNMT3A,  
169 DNMT3B and TET1 for 5mC; KMT1A and KDM4A for H3K9me3, and EZH2, KDM6A and  
170 KDM6B for H3K27me3.  $\beta$ -Actin (ACTB) was used as the reference gene. Total RNA was  
171 extracted using an RNA purification kit (PureLink, Thermo Fisher Scientific, U.S.) following  
172 the manufacturer's protocol and then reverse transcribed using SuperScript IV Reverse  
173 Transcriptase (Invitrogen, U.S.) with random hexamer primers. PowerUp SYBR Green  
174 (Applied Biosystems, U.S.) was used. Quantitative PCR (qPCR) was performed using  
175 QuantStudio 3 (Thermo Fisher, U.S.) following the MIQE guideline(Bustin et al., 2009). All  
176 qPCR primers were summarized in **Table S2** (Supporting Information).

177



178 **2.7 Data analysis and statistics:**

179 All data were presented as mean  $\pm$  standard deviation unless otherwise specified with  
180 independent replicates  $\geq 3$ . All statistical analysis and calculations were performed using  
181 OriginPro (Version 2019, North Hampton, MA) statistical software. Analysis of variance and  
182 Tukey's post-hoc test was used to calculate significance at different  $p$ -values. Principle  
183 Component Analysis and  $k$ -means clustering analysis was performed using Jupyter Notebook.

184

185 **3. RESULTS**

186 **3.1 Exposure to low dose of Pb affects SH-SY5Y differentiation**

187 SH-SY5Y cells were treated with 0, 15 and 50 ppb of Pb prior to differentiation for 96  
188 hours (4 days) following the scheme outlined in **Fig. 1A**. The dose of Pb was selected based  
189 on the current regulation standard while accounting for Pb concentrations observed in recent  
190 public health incidences. Specifically, the maximum allowed level of Pb in water is 15 ppb as  
191 set by EPA. Higher Pb concentrations have been recently reported in several public health  
192 incidence related to Pb exposure (Triantafyllidou et al., 2009; Triantafyllidou et al., 2013)  
193 Furthermore, U.S. Center for Disease Control and Prevention has recommended BLL of  
194  $5\mu\text{g/dL}$  (50 ppb) in children as the action level that requires medical attention.

195 We started by examining the effects of selected Pb concentrations on cell viability and  
196 morphology. After 96 hours of treatment, the selected Pb doses were found to have minimal  
197 effects on cell viability (**Fig. 1B**) and morphology, including nuclear size, eccentricity (which  
198 measures ratio of major and minor axis,  $e=0$  is a circle) and extent (which quantifies the  
199 irregularity of the nucleus, protrusions results in larger extents) (**Figs. S1A-C**, (Supporting

200 Information)) consistent with previous literature reports suggesting low doses of Pb (< 1  $\mu$ M  
201  $\cong$  207 ppb) have minimal effects on cell viability and phenotype (Crumpton et al., 2001;  
202 Deng et al., 2001).

203 Pb was then removed from culture medium by washing three times with PBS before  
204 starting differentiation. SH-SY5Y cells can be differentiated into neuron-like cells that stain  
205 positive for MAP2 (see **Figs. 1C** and **S2A** (Supporting Information)), a neuron-specific  
206 protein that is essential for neurogenesis (Teng et al., 2001; Chilton and Gordon-Weeks,  
207 2007). In unexposed cells, ~ 75% of cells are found to be MAP2 positive (MAP2+%) (**Fig.**  
208 **S2B**, Supporting Information), which is in close accordance with literature reports suggesting  
209 the SH-SY5Y cells can be used as a model system to study neuronal differentiation (Dwane  
210 et al., 2013). Exposure to Pb can reduce MAP2+% particularly at 15 ppb as shown in **Fig.**  
211 **S2B** (Supporting Information). Although decrease in mean values are observed at 50 ppb  
212 compared to the control, the decrease was not found to be statistically significant. We  
213 subsequently quantified MAP2 expression as MAP2 staining intensity per cell. As shown in  
214 **Fig. 1D**, MAP2 intensity was significantly reduced after exposure to Pb. Quantitatively  
215 MAP2 intensity was reduced by ~ 30 and 10% after exposure to 15 and 50 ppb of Pb,  
216 respectively as shown in **Fig. 1D**.

217 Neurite outgrowth is an important characteristic of neuron that can be typically measured  
218 by neurite length and complexity. Neurite length was thus measured via ImageJ as shown **Fig.**  
219 **S2C** (Supporting Information) and summarized in **Fig.1E**. Exposure to Pb has resulted in  
220 longer neurite length at both 15 and 50 ppb but with seemingly reduced level of complexity  
221 (see **Fig. S2D** (Supporting Information)).

222 Nuclear morphology, including nucleus area, eccentricity and extent of differentiated  
223 neurons were determined similarly as described previously as shown in **Figs. S1D-F**  
224 (Supporting Information). After the completion of differentiation, significant changes were  
225 observed in nucleus area and extent, suggesting the potential attenuation of exposure effects  
226 through differentiation.

227

### 228 *3.2 Low-dose of Pb exposure results in significant acute changes in epigenome*

229 Epigenetic changes consist primarily of DNA methylation and histone post-translational  
230 modifications. Compared to active epigenetic markers, i.e., histone acetylation, repressive  
231 epigenetic marks, such as DNA methylation (methylation of cytosine in particular),  
232 H3K9me3 and H3K27me3 are crucial for forming transcriptionally repressed regions  
233 essential for cell lineage determination (Hawkins et al., 2010; Becker et al., 2016) and tend to  
234 persist over time. We thus evaluated immediate changes in these repressive markers after Pb  
235 exposure.

236 SH-SY5Y cells were exposed to Pb for 96 hours, washed, fixed and immuno-stained for  
237 the selected epigenetic modifications, including 5mC, H3K9me3 and H3K27me3 as shown in  
238 **Figs. 2A-C**. More images of immuno-stained cells can be found in **Figs. S3A, D and G**  
239 (**Supporting Information**). After exposure, undifferentiated SH-SY5Y cells stained with  
240 5mC antibodies exhibit small islands enriched in 5mC as bright foci. Changes in 5mC can be  
241 quantified via Integrated Intensity per Nucleus (IIN) as established in literature (Kageyama et  
242 al., 2007; Ramsawhook et al., 2017; Stefanovski et al., 2017). Upon visual examination, Pb  
243 treatment does not seem to immediately elicit significant changes in 5mC patterns. Analysis

244 of IIN, however, suggests that Pb treatment can lead to ~ 12.3 and 8.5% reduction in 5mC  
245 levels for 15 and 50 ppb treated SH-SY5Y cells as shown in **Fig. 2D**.

246 A more in-depth pattern analysis was then carried out by identifying cell nucleus  
247 followed by determining foci features using a customized CellProfiler pipeline, as we  
248 detailed in our previous work(Sánchez et al., 2019). Representative images showing nucleus  
249 and foci identification via our pipeline for 5mC-stained images are shown in **Fig. S4A and B**  
250 (Supporting Information). To highlight changes in 5mC patterns due to Pb exposure, we  
251 included texture features only in our clustering analysis (all intensity and shape related  
252 features were omitted in constructing the principal component space). A PCA plot illustrating  
253 the separations of all treated groups are shown in **Fig. 2G**. No good separation is observed  
254 among differently treated cells suggesting no significant texture changes consistent with our  
255 visual observations.

256 RT-qPCR was then performed to determine changes in epigenetic enzymes that modulate  
257 5mC levels in cells. **Table S3 (Supporting Information)** summarizes our qPCR results.  
258 Relative changes in the mRNA levels of DNA methyltransferase, including DNMT1,  
259 DNMT3A, and DNMT3B, and DNA demethylase TET1 are shown in **Fig. 2J**. Pb treatments  
260 significantly upregulate the transcription level of DNMT3A (*de novo* DNA methyltransferase)  
261 and TET1 at 15 ppb, and DNMT1 (maintenance DNMT) at 50 ppb with respect to the control,  
262 having fold changes in the gene expression of DNMT3A, DNMT1 and TET1 of 2.79, 3.32,  
263 and 2.78, respectively. In addition, within Pb treatments the transcription level of DNMT1,  
264 DNMT3A, and DNMT3B (*de novo* DNA methyltransferase) presented significant difference.  
265 The increment of Pb concentration from 15 ppb to 50 ppb thus caused an upregulation in

266 DNMT1, while DNMT3A and DNMT3B were downregulated. These results can partially  
267 explain the obtained changes in 5mC during Pb exposure.

268 Similar analysis was performed for H3K9me3 and H3K27me3 stained cells. Briefly,  
269 H3K9me3 form larger and more distinctive clusters compared to 5mC. These clusters are  
270 enriched within cell nucleus marking constitutive heterochromatin regions as well as in the  
271 perinuclear region marking laminin-associated domains as shown in **Fig. 2B** and **S3D**  
272 (Supporting Information). Intensity analysis suggests ~ 12.3% reduction and 10.4% increase  
273 in H3K9me3 levels for cells exposed to 15 and 50 ppb of Pb, respectively as shown in **Fig.**  
274 **2E**. Visual inspection of stained cells does not suggest any significant pattern changes. PCA  
275 analysis was performed using identified cluster features (see also **Fig. S4C** (Supporting  
276 Information)) as shown in **Fig. 2H**. Cells with different treatments are not distinguishable  
277 within the PC space suggesting no significant pattern changes. **Fig. 2K** summarizes changes  
278 in H3K9me3 writer (KMT1A) and eraser (KDM4A). Relative to the untreated control, Pb  
279 treatment mainly affects the transcription level of KDM4A, increasing its gene expression  
280 level by 1.52-fold at 50 ppb. Within Pb treatment groups, increasing the Pb concentration  
281 from 15 to 50 ppb causes a significant reduction in the mRNA level of KMT1A while the  
282 mRNA level of KDM4A was increased. The observed changes in epigenetic enzymes cannot  
283 account for the observed changes in H3K9me3 resulting from 15 ppb treatment.

284 H3K27me3-stained cells exhibit a bright locus near the nucleus periphery, corresponding  
285 to bar body found in female origin cells, i.e., SH-SY5Y, representing inactive X chromosome  
286 (Chadwick and Willard, 2004; Shenoda et al., 2018). Small foci enriched in H3K27me3  
287 features are also found primarily within cell nucleus but also in the periphery regions as

288 shown in **Figs. 2C and S3G** (Supporting Information). Intensity analysis of exposed cells  
289 revealed ~ 13.9 and 23.8% reduction in H3K27me3 levels for 15 and 50 ppb treatments,  
290 respectively as shown in **Fig. 2F**. Texture features from the segmented nucleus and foci (**Fig.**  
291 **S4D**) were compiled and analyzed using PCA as shown in **Fig. 2I**. Visual inspection of the  
292 plot suggests potential separations of Pb-naïve and treated cells, but the distinctions are not  
293 sufficient to form distinctive clusters using K-means clustering approach. RT-qPCR was then  
294 performed to assess changes in H3K27me3 writer (i.e., EZH2) and erasers (i.e., KDM6A and  
295 KDM6B) as shown in **Fig. 2L**. Relative to the control, exposure to 50 ppb of Pb increased the  
296 transcription level of KDM6A and KDM6B by ~ 3.6 and 6.6 folds, respectively. Within Pb  
297 treatments, mRNA levels for KDM6A significantly increased from 15 to 50 ppb. Conversely,  
298 no statistical difference was observed between the control and Pb treated groups for mRNA  
299 levels of EZH2. The observed changes in the expression of epigenetic enzymes can thus at  
300 least partially account for the observed changes in H3K27me3 after Pb exposure.

301

### 302 *3.3 Epigenome changes remain in exposed SH-SY5Y cells after cessation of exposure and* 303 *completion of differentiation*

304 Pb was removed from SH-SY5Y cell culture prior to initiating the differentiation protocol.  
305 Differentiation was completed on Day 14 and cells were fixed followed by immuno-staining  
306 for 5mC, H3K27me3 or H3K9me3 then. Typical images of post-differentiation neurons are  
307 shown in **Figs. 3A-C and S3B, E, and H** (Supporting Information). Significant intensity  
308 changes are still observed among different treatment groups and were compared to  
309 immediately after exposure to Pb (Day 0) as summarized in **Figs. 3D-F**. Briefly, after

310 differentiation, changes in 5mC are further amplified with a decrease in 5mC levels of ~ 55.1  
311 and 46.4% for 15 ppb and 50 ppb treatment groups respectively (**Fig. 3D**). The difference,  
312 however, is less discernable within Pb-treated groups. PCA analysis was carried out using  
313 texture features only as shown in **Fig. 3G**. The texture features of 5mC enable separations  
314 between Pb- naïve and treated groups after the removal of Pb and completion of  
315 differentiation. Two major clusters can be identified via Silhouette plot (Rousseeuw, 1987)  
316 followed by k-means clustering (LLOYD, 1982). Cluster 1 contains primarily untreated cells  
317 (~73 %) while Cluster 2 consists mainly of Pb-treated SH-SY5Y cells (~ 87 %) as shown in  
318 **Fig. S5A** (Supporting Information). The contributions of texture features were rank ordered  
319 via a Lasso analysis (Tibshirani, 2011) . Among the top 5 contributors as summarized in **Fig.**  
320 **S5B** (Supporting Information), entropy features of 5mC within a nucleus and texture features  
321 of each 5mC island (foci) were ranked the highest, suggesting association of significant  
322 arrangement of 5mC loci within a nucleus.

323 Different from changes in 5mC, alterations in H3K9me3 and H3K27me3 are  
324 compensated and (partially) recovered after the completion of differentiation. Specifically,  
325 H3K9me3 level was increased by ~ 58.9 and 56.0%, respectively as compared to the  
326 untreated group in contrast to a global decrease right after exposure to Pb (**Fig. 3E**). **Other**  
327 **than intensity, no significant texture changes are observed among treatment and control**  
328 **groups (Fig. 3H).**

329 Differentiated SH-SY5Y cells exhibit ~19.4 and 11.4% decrease in H3K27me3 levels  
330 from pre-differentiation exposure to 15 and 50 ppb of Pb, respectively (**Fig. 3F**). The  
331 decrease in H3K27me3 levels was amplified for 15 ppb treated cells while a partial recovery

332 was observed by cells exposed to 50 ppb contrasting to immediately after exposure (**Fig. 3F**).  
333 Texture analysis as shown in **Fig. 3I** does not suggest any significant alterations in  
334 H3K27me3 distributions within cell nucleus.

335

### 336 *3.4 Differentiation as a potential confounding factor in propagating epigenetic memory*

337 Systematic epigenome reprogramming is known to take place during differentiation  
338 leading to potential confounding effects (Li, 2002; Tibshirani, 2011). To understand this,  
339 control experiments were carried out as illustrated in **Fig. 4A**. Briefly, instead of starting  
340 differentiation right after exposure, SH-SY5Y cells were rinsed three times with PBS and  
341 continuously cultured in a Pb-free culture medium after cessation of exposure to Pb. Typical  
342 immuno-stained images for 5mC, H3K9me3 and H3K27me3 were summarized in **Figs. 4B-D**  
343 with more images in **Fig. S3 C, F and I** (Supporting Information). Differentiation results in  
344 significant increases in all selected repressive markers, namely 5mC, H3K9me3 and  
345 H3K27me3 levels as shown in **Fig. 4E-F** potentially as a result of heterochromatin  
346 establishment.

347 After cessation of exposure to Pb for 14 days, other than 5mC, changes in H3K9me3 and  
348 H3K27me3 are both compensated for as summarized in **Figs. 4E-G**. Specifically, changes in  
349 5mC after exposure to Pb are retained and amplified after 14 days. The magnitude in changes  
350 (~ 22.2 and 31.9% for 15 and 50 ppb of Pb, respectively), however, is much smaller  
351 compared to cells undergoing differentiation (~55.1 and 46.4% for 15 and 50 ppb of Pb,  
352 respectively) as shown in **Fig. 4E**. Changes in H3K9me3 are partially recovered after 14 days  
353 in continuously cultured SH-SY5Y cells (No statistical significance observed for 15 ppb, and



354 ~7% increase for 50 ppb ), while they were overcompensated in differentiated SH-SY5Y cells  
355 (see **Fig. 4F**). Surprisingly, in continuously cultured SH-SY5Y cells, changes in H3K27me3  
356 are overcompensated (~ 19.7 and 49.4% for 15 and 50 ppb of Pb, respectively), which exhibit  
357 a trend opposite of differentiated cells. Texture analysis was carried out similarly as described  
358 in the previous sections with results summarized in **Figs. 4H-J**. While the 5mC, H3K9me3  
359 H3K27me3 intensity levels of treated groups demonstrate significant difference from  
360 untreated controls, we cannot distinguish between Pb-naïve and treated based on their  
361 underlying texture features.

362 Changes in nuclear morphology of continuously cultured SH-SY5Y cells were also  
363 assessed as described for undifferentiated and differentiated cells previously. No significant  
364 changes were observed between Pb-naïve and treated groups as shown in **Figs. S1G-I**  
365 (Supporting Information).

366

## 367 **4. DISCUSSION**

### 368 *4.1 Exposure to low dose of Pb elicits immediate changes in gene repressive markers*

369 We selected to work with low doses of Pb (15 and 50 ppb) because of their relative high  
370 incidence of exposure (Hauptman et al., 2017; Lanphear et al., 2018) as well as increasing  
371 concerns of exposure-affiliated long-term neurodegenerative diseases at a later life stage  
372 (Shefa and Héroux, 2017; Bellinger et al., 2018). Exposure of SH-SY5Y cells to the selected  
373 doses of Pb for 96 hours do not elicit significant phenotypic changes in cells, including  
374 metabolic and morphological properties consistent with previous literature findings  
375 (Crumpton et al., 2001; Deng et al., 2001).

376           Meanwhile, significant changes are observed in selected epigenetic markers, namely  
377 5mC, H3K9me3 and H3K27me3. 5mC is the most abundant epigenetic changes occurring on  
378 DNA and has an established role in gene regulation (Cedar and Razin, 2017; Kribelbauer et  
379 al., 2017). Exposure to Pb resulted in larger reductions in 5mC at 15 ppb compared to cells  
380 exposed to 50 ppb of Pb suggesting non-linear dependence in Pb doses. The acute 5mC  
381 changes occur globally with no significant pattern changes observed within cell nucleus right  
382 after exposure. Changes in the expression of 5mC writer and eraser enzymes are also  
383 observed with an overall increase in both writer and eraser enzyme expression at 15 ppb and  
384 dominate changes only in 5mC writer enzymes at 50 ppb. The expression level changes of  
385 these epigenetic enzymes can thus partially explain the observed 5mC but may also have  
386 contributions from altered epigenetic enzyme activities as demonstrated in literature (Sanchez  
387 et al., 2017).

388           Exposure to low dose of Pb has been shown to alter DNA methylation level in several  
389 animal studies, including zebrafish (Sanchez et al., 2017), rat (Sun et al., 2017; Singh et al.,  
390 2018a) and human cell lines (Li et al., 2011; Nye et al., 2015). The observed nonlinear  
391 dose-response is not uncommon. For example, in a recent rat study researchers have found  
392 that a significant larger number of genes are differentially methylated after exposure to low  
393 dose of Pb at 150 ppm as compared to 375 ppm (Singh et al., 2018b).

394           H3K9me3 and H3K27me3 are both suppressive markers typically found in  
395 transcriptionally silent chromatin regions. H3K9me3 are particularly enriched in constitutive  
396 heterochromatin that are almost permanently turned off (Becker et al., 2016). H3K27me3, on  
397 the other hand, is enriched in facultative heterochromatin that are suppressed and poised for

398 potential activation(Richards and Elgin, 2002). Both H3K9me3 and H3K27me3 play an  
399 important role during differentiation(Tan et al., 2012; Tyssowski et al., 2014; Yao et al., 2016).  
400 For instance, protein-coding genes in an early stage, undifferentiated cells at germ-layer,  
401 exhibit high levels of H3K9me3 located mainly in gene bodies, promoters, and termination  
402 transcription sites that is reduced upon differentiation (Nicetto et al., 2019). The proper  
403 establishment of constitutive heterochromatin is relevant for preventing cell reprogramming  
404 and silencing undesirable lineage-specific genes to preserve cellular identity (Becker et al.,  
405 2016). H3K27me3 is more evenly distributed over genes and intragenic regions in  
406 differentiated cells and is reduced significantly during cell differentiation (Nicetto et al.,  
407 2019). Moreover, changes in H3K9me3 and H3K27me3 are known to be potentially  
408 persistent and inheritable across generations (Zenk et al., 2017; Perez and Lehner, 2019)  
409 warranting detailed study in this work. Global reduction in H3K9me3 level is observed at 15  
410 ppb while a slight increase is observed at 50 ppb, mirroring discoveries in 5mC and  
411 suggesting a non-linear dose dependence. Although changes are observed in H3K9me3 writer  
412 and erase enzymes, the observed changes cannot fully explain the alterations in H3K9me3  
413 levels at lower dosage Pb exposures. SH-SY5Y cells exposed to Pb exhibit significant  
414 reductions in H3K27me3 levels (with 13.9 and 23.8% for 15 and 50 ppb respectively).  
415 Significant increase is observed in the transcriptional level of H3K27me3 erasers, namely  
416 KDM6A and KDM6B providing a plausible explanation to the observed global changes in  
417 H3K27me3.

418 Limited studies exist examining the effects of Pb-exposure on histone modifications. A  
419 mouse study suggests that prenatal exposure to Pb of 100 ppm, where pups were continuous

420 exposed to Pb from gestation to lactation, can reduce H3K9me3 level in the cortex of female  
421 and male rats by 49 and 65%, respectively (Schneider et al., 2016). Similar trend was  
422 recapitulated in our cell culture study. The observed changes in H3K9me3 seemingly mirror  
423 changes in 5mC at different Pb doses suggesting a potential cross-talking between DNA  
424 methylation and H3K9me3, which has been suggested in literature (Du et al., 2015; Zhao et  
425 al., 2016) and observed in our previous work of human cells exposure to atrazine (Sánchez et  
426 al., 2020).

427 Exposure to Pb ( $5\mu\text{M} \cong 1035 \text{ ppb}$ ) has been reported to result in ~30% reduction in  
428 H3K27me3 at hippocampal neurons from rats (Gu et al., 2019). Similar reductions in  
429 H3K27me3 were also observed in hippocampus of female rats with chronic exposure to Pb of  
430 125 ppm (Xiao et al., 2020). Our observations in SH-SY5Y cells are thus consistent with  
431 literature findings and thus can be plausibly explained by increase in the transcriptional level  
432 of H3K27me3 erasers.

#### 433 ***4.2 Long-term epigenome changes with and without differentiation***

434 Different from genetic mutations that are irreversible in nature, epigenetic changes are  
435 dynamic and thus potentially reversible. The dynamic balance of an epigenetic change is  
436 typically modulated by the presence of epigenetic writer and eraser enzyme. Most exposures  
437 to environmental chemicals are for a short duration of time. Assessing the persistence of  
438 acquired epigenome changes after cessation of exposure is thus critically important to  
439 understand their potential roles in long-term health. Here, we considered two different  
440 scenarios after cessation of exposure, namely through continuous culturing and via a  
441 neuron-specific differentiation. Changes persists in both cases while details vary depending

442 on the type of modification and culturing methods.

443 After cessation of exposure, continuously cultured cells maintain its lower 5mC level  
444 compared to the untreated control and the changes are seemingly amplified after 14 days.  
445 Differentiation further amplifies the difference in 5mC levels among our experimental groups.  
446 In addition to global intensity changes, significant alterations in 5mC distribution patterns are  
447 also determined via texture analysis. After differentiation, untreated cells have significantly  
448 increased 5mC levels with more distinctive 5mC-enriched islands established within the cell  
449 nucleus. A more random and diffusive pattern, however, is observed in treated cells  
450 suggesting less well-defined heterochromatin regions separated by distinctive 5mC levels.

451 Different from 5mC, cells try to compensate for the loss in both H3K9me3 and  
452 H3K27me3 levels after removal of Pb with and without differentiation. H3K9me3 level is  
453 almost completely restored and becomes almost indistinguishable from the untreated group  
454 after 14 days of continuous culturing. With differentiation, significant increase in H3K9me3  
455 is observed suggesting an overall upregulation in H3K9me3 likely prompted by homeostasis  
456 and differentiation driving forces. Changes in H3K27me3 are also compensated in both  
457 continuous culturing and differentiation experiments. The compensation, however, is more  
458 significant in continuously cultured cells resulting in an increase in H3K27me3 levels after  
459 14 days, while differentiated SH-SY5Y cells with prior exposure to Pb becomes more like  
460 their untreated counterpart.

461 Accompanying the observed epigenome changes, we also noted significant alterations in  
462 nuclear size and morphology as summarized in **Fig. S1** (Supporting Information) only in  
463 differentiated cells treated with Pb. After exposure to Pb, differentiated neurons exhibit larger

464 nucleus area relative to their untreated counterparts. Nuclear eccentricity that measures the  
465 roundness of cells were not significantly altered. Nuclear extent which quantifies shape  
466 irregularity was also found to be significantly altered after Pb exposure. The absence of  
467 nuclear alteration in after exposure and continuously cultured cells further suggests a  
468 potential compounding effect of low dosage Pb exposure on neuronal differentiation. Neurite  
469 length difference was also observed in differentiated SH-SY5Y cells after exposure to Pb  
470 with increased neurite length and reduce complexity. This finding suggests that neurite  
471 outgrowth was potentially impaired in differentiated neurons after exposure to Pb. This is  
472 consistent with previous study using PC12 cells suggesting Pb-treated PC12 cells can  
473 demonstrate enhanced neurite outgrowth (Crumpton et al., 2001; Davidovics and DiCicco-  
474 Bloom, 2005). Furthermore, exposed SH-SY5Y cells have lower neuron differentiation  
475 efficiency featuring decreased MAP2+% cells and the reduction in MAP2 expression levels  
476 suggests a less stable neuroarchitecture is formed. We then correlated changes in the observed  
477 phenotypic features (MAP2 expression and Neurite length) with Pb doses as shown in **Fig. 5**.  
478 Similar correlations were also performed using 5mC and Pb doses. A strong positive  
479 correlation was observed between the phenotypic alterations and 5mC changes (Pearson's  
480 correlation = 0.9998 and 0.9891 for MAP2 expression and neurite length, respectively)  
481 suggesting a potential underlying correlative/causative relationship.

482 Persistent changes in 5mC after exposure to Pb have been reported in PC12 cells using  
483 Pb doses of 50 (10.35 ppb), 250 (51.71 ppb), and 500 nM (103.5 ppb) (Li et al., 2012).  
484 Cynomolgus monkeys with Pb exposure at infancy was found to exhibit impaired DNMT  
485 activities (~20% reductions in activity) in brain tissue 23 years after exposure (Wu et al.,

486 2008). Our observations are thus consistent with previous literature reports. To the best of our  
487 knowledge, no studies have evaluated the persistency of H3K9me3 and H3K27me3 marks  
488 after cessation of Pb exposure.

489

## 490 **5. CONCLUSIONS**

491 Collectively, exposure to low doses of Pb can alter 5mC levels which can persist and  
492 attenuate through time and differentiation. Changes in histone repressive markers, H3K9me3  
493 and H3K27me3 are both compensated for during continuous culturing and differentiation.  
494 Over-compensations, however, are observed for H3K9me3 during differentiation and  
495 H3K27me3 during continuous culturing. Although no phenotypic changes are observed  
496 immediately after Pb exposure, significant alterations are observed in the differentiation  
497 ability, neurite outgrowth and neurite length after Pb exposure prior to differentiation.  
498 Dose-dependent phenotypic changes seem to correlate well with alterations in 5mC levels.  
499 Taken together, our results unequivocally suggest that exposure to low dose of Pb,  
500 particularly prior to differentiation, can result in persistent changes in epigenome last after  
501 cessation of Pb exposure and potentially contribute to the observed phenotypic changes with  
502 implications in long-term health.

503

504 **REFERENCE**

- 505 2007. Lead and copper rule. in: U.S.C (Ed.). Code of Federal Regulations 40 CFR Part 141.
- 506 Annest, J.L., Pirkle, J.L., Makuc, D., Neese, J.W., Bayse, D.D., Kovar, M.G., 1983. Chronological trend  
507 in blood lead levels between 1976 and 1980. *The New England journal of medicine* 308, 1373-1377.
- 508 Becker, J.S., Nicetto, D., Zaret, K.S., 2016. H3K9me3-Dependent Heterochromatin: Barrier to Cell  
509 Fate Changes. *Trends in Genetics* 32, 29-41.
- 510 Bellinger, D., Leviton, A., Waternaux, C., Needleman, H., Rabinowitz, M., 1987. Longitudinal Analyses  
511 of Prenatal and Postnatal Lead Exposure and Early Cognitive Development. *New England Journal of*  
512 *Medicine* 316, 1037-1043.
- 513 Bellinger, D.C., Malin, A., Wright, R.O., 2018. The Neurodevelopmental Toxicity of Lead: History,  
514 Epidemiology, and Public Health Implications. *Advances in Neurotoxicology*. Elsevier, pp. 1-26.
- 515 Bellinger, D.C., Stiles, K.M., Needleman, H.L., 1992. Low-level lead exposure, intelligence and  
516 academic achievement: a long-term follow-up study. *Pediatrics* 90, 855-861.
- 517 Bihaji, S.W., Eid, A., Zawia, N.H., 2017. Lead exposure and tau hyperphosphorylation: an in vitro  
518 study. *Neurotoxicology* 62, 218-223.
- 519 Bustin, S.A., Benes, V., Garson, J.A., Hellemans, J., Huggett, J., Kubista, M., Mueller, R., Nolan, T.,  
520 Pfaffl, M.W., Shipley, G.L., Vandesompele, J., Wittwer, C.T., 2009. The MIQE Guidelines: Minimum  
521 Information for Publication of Quantitative Real-Time PCR Experiments. *Clinical Chemistry* 55,  
522 611-622.
- 523 Caudle, W.M., Guillot, T.S., Lazo, C.R., Miller, G.W., 2012. Industrial toxicants and Parkinson's  
524 disease. *Neurotoxicology* 33, 178-188.
- 525 Cecil, K.M., Brubaker, C.J., Adler, C.M., Dietrich, K.N., Altaye, M., Egelhoff, J.C., Wessel, S.,  
526 Elangovan, I., Hornung, R., Jarvis, K., 2008a. Decreased brain volume in adults with childhood lead



527 exposure. PLoS medicine 5.

528 Cecil, K.M., Brubaker, C.J., Adler, C.M., Dietrich, K.N., Altaye, M., Egelhoff, J.C., Wessel, S.,  
529 Elangovan, I., Hornung, R., Jarvis, K., Lanphear, B.P., 2008b. Decreased Brain Volume in Adults with  
530 Childhood Lead Exposure. PLoS Medicine 5.

531 Cecil, K.M., Dietrich, K.N., Altaye, M., Egelhoff, J.C., Lindquist, D.M., Brubaker, C.J., Lanphear, B.P.,  
532 2011. Proton magnetic resonance spectroscopy in adults with childhood lead exposure. Environmental  
533 health perspectives 119, 403-408.

534 Cedar, H., Razin, A., 2017. Annotating the genome by DNA methylation. Int J Dev Biol 61, 137-148.

535 Chadwick, B.P., Willard, H.F., 2004. Multiple spatially distinct types of facultative heterochromatin on  
536 the human inactive X chromosome. Proceedings of the National Academy of Sciences 101,  
537 17450-17455.

538 Chilton, J.K., Gordon-Weeks, P.R., 2007. Role of microtubules and MAPs during neuritogenesis.  
539 Intracellular mechanisms for neuritogenesis. Springer, pp. 57-88.

540 Coon, S., Stark, A., Peterson, E., Gloi, A., Kortsha, G., Pounds, J., Chettle, D., Gorell, J., 2006.  
541 Whole-body lifetime occupational lead exposure and risk of Parkinson's disease. Environmental health  
542 perspectives 114, 1872-1876.

543 Crumpton, T., Atkins, D.S., Zawia, N.H., Barone, S., 2001. Lead Exposure in Pheochromocytoma  
544 (PC12) Cells Alters Neural Differentiation and Sp1 DNA-Binding. NeuroToxicology 22, 49-62.

545 Davidovics, Z., DiCicco-Bloom, E., 2005. Moderate lead exposure elicits neurotrophic effects in  
546 cerebral cortical precursor cells in culture. Journal of Neuroscience Research 80, 817-825.

547 Deng, W., McKinnon, R.D., Poretz, R.D., 2001. Lead Exposure Delays the Differentiation of  
548 Oligodendroglial Progenitors in Vitro. Toxicology and Applied Pharmacology 174, 235-244.

549 Dignam, T., Kaufmann, R.B., LeSturgeon, L., Brown, M., 2019. Control of Lead Sources in the United  
550 States, 1970-2017: Public Health Progress and Current Challenges to Eliminating Lead Exposure.  
551 *Journal of Public Health Management and Practice* 25.

552 Du, J., Johnson, L.M., Jacobsen, S.E., Patel, D.J., 2015. DNA methylation pathways and their  
553 crosstalk with histone methylation. *Nature reviews Molecular cell biology* 16, 519-532.

554 Dwane, S., Durack, E., Kiely, P.A., 2013. Optimising parameters for the differentiation of SH-SY5Y  
555 cells to study cell adhesion and cell migration. *BMC research notes* 6, 366.

556 Eid, A., Bihagi, S.W., Renehan, W.E., Zawia, N.H., 2016. Developmental lead exposure and lifespan  
557 alterations in epigenetic regulators and their correspondence to biomarkers of Alzheimer's disease.  
558 *Alzheimer's & Dementia: Diagnosis, Assessment & Disease Monitoring* 2, 123-131.

559 Fanti, Z., De-Miguel, F.F., Martinez-Perez, M.E., 2008. A method for semiautomatic tracing and  
560 morphological measuring of neurite outgrowth from DIC sequences. 2008 30th Annual International  
561 Conference of the IEEE Engineering in Medicine and Biology Society, pp. 1196-1199.

562 Flora, G., Gupta, D., Tiwari, A., 2012. Toxicity of lead: A review with recent updates. *Interdisciplinary*  
563 *Toxicology* 5, 47-58.

564 Gu, X., Xu, Y., Xue, W.-Z., Wu, Y., Ye, Z., Xiao, G., Wang, H.-L., 2019. Interplay of miR-137 and EZH2  
565 contributes to the genome-wide redistribution of H3K27me3 underlying the Pb-induced memory  
566 impairment. *Cell Death & Disease* 10, 671.

567 Hauptman, M., Bruccoleri, R., Woolf, A.D., 2017. An Update on Childhood Lead Poisoning. *Clinical*  
568 *Pediatric Emergency Medicine* 18, 181-192.

569 Hawkins, D.R., Hon, G.C., Lee, L.K., Ngo, Q., Lister, R., Pelizzola, M., Edsall, L.E., Kuan, S., Luu, Y.,  
570 Klugman, S., Antosiewicz-Bourget, J., Ye, Z., Espinoza, C., Agarwahl, S., Shen, L., Ruotti, V., Wang,

571 W., Stewart, R., Thomson, J.A., Ecker, J.R., Ren, B., 2010. Distinct Epigenomic Landscapes of  
572 Pluripotent and Lineage-Committed Human Cells. *Cell Stem Cell* 6, 479-491.

573 Jarvis, P., Quy, K., Macadam, J., Edwards, M., Smith, M., 2018. Intake of lead (Pb) from tap water of  
574 homes with leaded and low lead plumbing systems. *Science of the Total Environment* 644, 1346-1356.

575 Kageyama, S.-i., Liu, H., Kaneko, N., Ooga, M., Nagata, M., Aoki, F., 2007. Alterations in epigenetic  
576 modifications during oocyte growth in mice. *Reproduction* 133, 85-94.

577 Kribelbauer, J.F., Laptenko, O., Chen, S., Martini, G.D., Freed-Pastor, W.A., Prives, C., Mann, R.S.,  
578 Bussemaker, H.J., 2017. Quantitative Analysis of the DNA Methylation Sensitivity of Transcription  
579 Factor Complexes. *Cell Reports* 19, 2383-2395.

580 Lanphear, B.P., Dietrich, K., Auinger, P., Cox, C., 2000. Cognitive deficits associated with blood lead  
581 concentrations <10 microg/dL in US children and adolescents. *Public health reports (Washington,*  
582 *D.C. : 1974)* 115, 521-529.

583 Lanphear, B.P., Rauch, S., Auinger, P., Allen, R.W., Hornung, R.W., 2018. Low-level lead exposure  
584 and mortality in US adults: a population-based cohort study. *The Lancet Public Health* 3, e177-e184.

585 Lee, J., Peterson, S.M., Freeman, J.L., 2017. Sex-specific characterization and evaluation of the  
586 Alzheimer's disease genetic risk factor sorl1 in zebrafish during aging and in the adult brain following a  
587 100 ppb embryonic lead exposure. *Journal of Applied Toxicology* 37, 400-407.

588 Li, C., Xu, M., Wang, S., Yang, X., Zhou, S., Zhang, J., Liu, Q., Sun, Y., 2011. Lead exposure  
589 suppressed ALAD transcription by increasing methylation level of the promoter CpG islands. *Toxicol*  
590 *Lett* 203, 48-53.

591 Li, E., 2002. Chromatin modification and epigenetic reprogramming in mammalian development.  
592 *Nature Reviews Genetics* 3, 662-673.

593 Li, Y.Y., Chen, T., Wan, Y., Xu, S.q., 2012. Lead exposure in pheochromocytoma cells induces  
594 persistent changes in amyloid precursor protein gene methylation patterns. *Environmental Toxicology*  
595 *27*, 495-502.

596 LLOYD, S.P., 1982. Least squares quantization in PCM. *IEEE transactions on information theory*.

597 Mansouri, M.T., Cauli, O., 2009. Motor alterations induced by chronic lead exposure. *Environmental*  
598 *toxicology and pharmacology 27*, 307-313.

599 Meissner, G., 2017. The structural basis of ryanodine receptor ion channel function. *Journal of General*  
600 *Physiology 149*, 1065-1089.

601 Meyer, D.N., Crofts, E.J., Akemann, C., Gurdziel, K., Farr, R., Baker, B.B., Weber, D., Baker, T.R.,  
602 2020. Developmental exposure to Pb<sup>2+</sup> induces transgenerational changes to zebrafish brain  
603 transcriptome. *Chemosphere 244*, 125527.

604 Needleman, H., 2004. Lead Poisoning. *Annual Review of Medicine 55*, 209-222.

605 Nevin, R., 2000. How Lead Exposure Relates to Temporal Changes in IQ, Violent Crime, and Unwed  
606 Pregnancy. *Environmental Research 83*, 1-22.

607 Nevin, R., 2007. Understanding international crime trends: the legacy of preschool lead exposure.  
608 *Environmental research 104*, 315-336.

609 Nicetto, D., Donahue, G., Jain, T., Peng, T., Sidoli, S., Sheng, L., Montavon, T., Becker, J.S.,  
610 Grindheim, J.M., Blahnik, K., 2019. H3K9me3-heterochromatin loss at protein-coding genes enables  
611 developmental lineage specification. *Science 363*, 294-297.

612 Nriagu, J.O., 1990. The rise and fall of leaded gasoline. *Science of The Total Environment 92*, 13-28.

613 Nye, M.D., Hoyo, C., Murphy, S.K., 2015. In vitro lead exposure changes DNA methylation and  
614 expression of IGF2 and PEG1/MEST. *Toxicology in Vitro 29*, 544-550.

615 Perez, M.F., Lehner, B., 2019. Intergenerational and transgenerational epigenetic inheritance in  
616 animals. *Nature cell biology* 21, 143-151.

617 Pieper, K.J., Martin, R., Tang, M., Walters, L., Parks, J., Roy, S., Devine, C., Edwards, M.A., 2018.  
618 Evaluating Water Lead Levels During the Flint Water Crisis. *Environmental Science & Technology* 52,  
619 8124-8132.

620 Ramsawhook, A.H., Lewis, L.C., Eleftheriou, M., Abakir, A., Durczak, P., Markus, R., Rajani, S.,  
621 Hannan, N.R., Coyle, B., Ruzov, A., 2017. Immunostaining for DNA modifications: computational  
622 analysis of confocal images. *JoVE (Journal of Visualized Experiments)*, e56318.

623 Richards, E.J., Elgin, S., 2002. Epigenetic Codes for Heterochromatin Formation and Silencing  
624 Rounding up the Usual Suspects. *Cell* 108, 489-500.

625 Rousseeuw, P.J., 1987. Silhouettes: A graphical aid to the interpretation and validation of cluster  
626 analysis. *Journal of Computational and Applied Mathematics* 20, 53-65.

627 Sanchez, O.F., Lee, J., Hing, N.Y.K., Kim, S.-E., Freeman, J.L., Yuan, C., 2017. Lead (Pb) exposure  
628 reduces global DNA methylation level by non-competitive inhibition and alteration of dnmt expression.  
629 *Metallomics* 9, 149-160.

630 Sánchez, O.F., Lin, L., Bryan, C.J., Xie, J., Freeman, J.L., Yuan, C., 2020. Profiling epigenetic changes  
631 in human cell line induced by atrazine exposure. *Environmental Pollution* 258, 113712.

632 Sánchez, O.F., Mendonca, A., Min, A., Liu, J., Yuan, C., 2019. Monitoring Histone Methylation  
633 (H3K9me3) Changes in Live Cells. *ACS Omega* 4, 13250-13259.

634 Schneider, J.S., Anderson, D.W., Kidd, S.K., Sobolewski, M., Cory-Slechta, D.A., 2016.  
635 Sex-dependent effects of lead and prenatal stress on post-translational histone modifications in frontal  
636 cortex and hippocampus in the early postnatal brain. *NeuroToxicology* 54, 65-71.

- 637 Shefa, S.T., Héroux, P., 2017. Both physiology and epidemiology support zero tolerable blood lead  
638 levels. *Toxicol Lett* 280, 232-237.
- 639 Shenoda, B.B., Tian, Y., Alexander, G.M., Aradillas-Lopez, E., Schwartzman, R.J., Ajit, S.K., 2018.  
640 miR-34a-mediated regulation of XIST in female cells under inflammation. *Journal of pain research* 11,  
641 935.
- 642 Shipley, M.M., Mangold, C.A., of Visualized, S.-M.L., 2016. Differentiation of the SH-SY5Y human  
643 neuroblastoma cell line. *JoVE (Journal of Visualized ....*
- 644 Singh, G., Singh, V., Wang, Z.-X., Voisin, G., Lefebvre, F., Navenot, J.M., Evans, B., Verma, M.,  
645 Anderson, D.W., Schneider, J.S., 2018a. Effects of developmental lead exposure on the hippocampal  
646 methylome: Influences of sex and timing and level of exposure. *Toxicol Lett* 290, 63-72.
- 647 Singh, G., Singh, V., Wang, Z.-X., Voisin, G., Lefebvre, F., Navenot, J.M., Evans, B., Verma, M.,  
648 Anderson, D.W., Schneider, J.S., 2018b. Effects of developmental lead exposure on the hippocampal  
649 methylome: Influences of sex and timing and level of exposure. *Toxicology Letters* 290, 63-72.
- 650 Stefanovski, D., Tang, G., Wawrowsky, K., Boston, R.C., Lambrecht, N., Tajbakhsh, J., 2017. Prostate  
651 cancer diagnosis using epigenetic biomarkers, 3D high-content imaging and probabilistic cell-by-cell  
652 classifiers. *Oncotarget* 8, 57278.
- 653 Sun, H., Wang, N., Nie, X., Zhao, L., Li, Q., Cang, Z., Chen, C., Lu, M., Cheng, J., Zhai, H., Xia, F., Ye,  
654 L., Lu, Y., 2017. Lead Exposure Induces Weight Gain in Adult Rats, Accompanied by DNA  
655 Hypermethylation. *PLOS ONE* 12.
- 656 Tan, S.-L., Nishi, M., Ohtsuka, T., Matsui, T., Takemoto, K., Kamio-Miura, A., Aburatani, H., Shinkai, Y.,  
657 Kageyama, R., 2012. Essential roles of the histone methyltransferase ESET in the epigenetic control  
658 of neural progenitor cells during development. *Development* 139, 3806-3816.

659 Teng, J., Takei, Y., Harada, A., Nakata, T., Chen, J., Hirokawa, N., 2001. Synergistic effects of MAP2  
660 and MAP1B knockout in neuronal migration, dendritic outgrowth, and microtubule organization. *J Cell*  
661 *Biol* 155, 65-76.

662 Tibshirani, R., 2011. Regression shrinkage and selection via the lasso: a retrospective. *Journal of the*  
663 *Royal Statistical Society: Series B* ....

664 Triantafyllidou, S., Nguyen, C.K., Zhang, Y., Edwards, M.A., 2013. Lead (Pb) quantification in potable  
665 water samples: implications for regulatory compliance and assessment of human exposure. *Environmental Monitoring and Assessment* 185, 1355-1365.

666 Triantafyllidou, S., Y., L.-., EDWARDS, M., 2009. Lead (Pb) exposure through drinking water: lessons  
667 to be learned from recent US experience. *Global NEST* ....

668 Tyssowski, K., Kishi, Y., Gotoh, Y., 2014. Chromatin regulators of neural development. *Neuroscience*  
669 264, 4-16.

670 Watanabe, T., Zhang, Z.-W., Qu, J.-B., Gao, W.-P., Jian, Z.-K., Shimbo, S., Nakatsuka, H.,  
671 Matsuda-Inoguchi, N., Higashikawa, K., Ikeda, M., 2000. Background lead and cadmium exposure of  
672 adult women in Xian City and two farming villages in Shaanxi Province, China. *Science of The Total*  
673 *Environment* 247, 1-13.

674 Weisskopf, M.G., Weuve, J., Nie, H., Saint-Hilaire, M.-H., Sudarsky, L., Simon, D.K., Hersh, B.,  
675 Schwartz, J., Wright, R.O., Hu, H., 2010. Association of cumulative lead exposure with Parkinson's  
676 disease. *Environmental health perspectives* 118, 1609-1613.

677 Wilson, N., Horrocks, J., 2008. Lessons from the removal of lead from gasoline for controlling other  
678 environmental pollutants: a case study from New Zealand. *Environmental health : a global access*  
679 *science source* 7, 1.

681 Wu, J., Basha, M., Brock, B., Cox, D.P., Cardozo-Pelaez, F., McPherson, C.A., Harry, J., Rice, D.C.,  
682 Maloney, B., Chen, D., Lahiri, D.K., Zawia, N.H., 2008. Alzheimer's Disease (AD)-Like Pathology in  
683 Aged Monkeys after Infantile Exposure to Environmental Metal Lead (Pb): Evidence for a  
684 Developmental Origin and Environmental Link for AD. *The Journal of Neuroscience* 28, 3-9.

685 Xiao, J., Wang, T., Xu, Y., Gu, X., Li, D., Niu, K., Wang, T., Zhao, J., Zhou, R., Wang, H.-L., 2020.  
686 Long-term probiotic intervention mitigates memory dysfunction through a novel H3K27me3-based  
687 mechanism in lead-exposed rats. *Translational Psychiatry* 10, 25.

688 Xicoy, H., Wieringa, B., Martens, G.J., 2017. The SH-SY5Y cell line in Parkinson's disease research: a  
689 systematic review. *Molecular neurodegeneration* 12, 10.

690 Yan, D., Wang, L., Ma, F.-L., Deng, H., Liu, J., Li, C., Wang, H., Chen, J., Tang, J.-L., Ruan, D.-Y.,  
691 2008. Developmental exposure to lead causes inherent changes on voltage-gated sodium channels in  
692 rat hippocampal CA1 neurons. *Neuroscience* 153, 436-445.

693 Yao, B., Christian, K.M., He, C., Jin, P., Ming, G.-L., Song, H., 2016. Epigenetic mechanisms in  
694 neurogenesis. *Nature reviews. Neuroscience* 17, 537-549.

695 Zenk, F., Loeser, E., Schiavo, R., Kilpert, F., Bogdanović, O., Iovino, N., 2017. Germ line-inherited  
696 H3K27me3 restricts enhancer function during maternal-to-zygotic transition. *Science* 357, 212-216.

697 Zhao, Q., Zhang, J., Chen, R., Wang, L., Li, B., Cheng, H., Duan, X., Zhu, H., Wei, W., Li, J., 2016.  
698 Dissecting the precise role of H3K9 methylation in crosstalk with DNA maintenance methylation in  
699 mammals. *Nature communications* 7, 1-12.

700 Zou, R.-X., Gu, X., Ding, J.-J., Wang, T., Bi, N., Niu, K., Ge, M., Chen, X.-T., Wang, H.-L., 2020. Pb  
701 exposure induces an imbalance of excitatory and inhibitory synaptic transmission in cultured rat  
702 hippocampal neurons. *Toxicology in Vitro* 63, 104742.



703

## Artwork and Tables

### Low Dose Lead Exposure Induces Alterations on Heterochromatin Hallmarks Persisting Through SH-SY5Y Cell Differentiation

Li Lin<sup>1,#</sup>, Junkai Xie<sup>1</sup>, Oscar F. Sanchez<sup>2</sup>, Chris Bryan<sup>3</sup>, Jennifer Freeman<sup>4</sup>, Chongli Yuan<sup>1,5\*</sup>

1. Davidson School of Chemical Engineering, Purdue University, West Lafayette, IN 47907, USA
2. Department of Nutrition and Biochemistry, Pontificia Universidad Javeriana, Bogotá, 110231, Colombia
3. Department of Statistics, Purdue University, West Lafayette, IN, 47907, USA
4. School of Health Science, Purdue University, West Lafayette, IN 47907, USA
5. Purdue University Center for Cancer Research, West Lafayette, IN, 47907, USA

#: Current Address: Department of Chemical and Biomolecular Engineering, University of California, Berkeley,  
CA 94704, USA

\* To whom correspondence should be addressed. Tel: + 1 765 494 5824; Fax: + 1 765 494 0805; Email:

[cyuan@purdue.edu](mailto:cyuan@purdue.edu)

The authors declare they have no actual or potential competing financial interests.

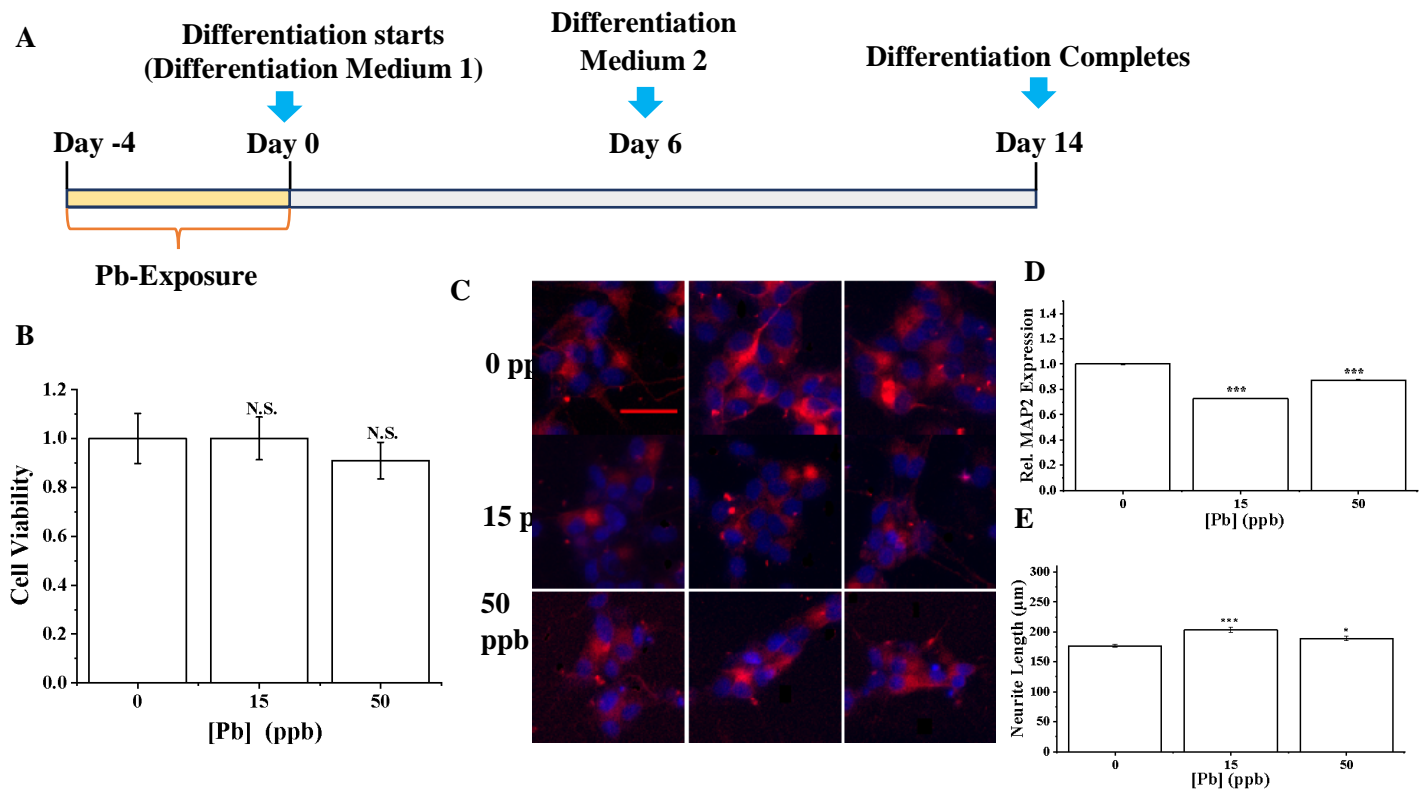

**Fig.1** (A) A schematic illustration of the exposure and differentiation timeline for SH-SY5Y cells. (B) Viability of cells after exposure to Pb of different doses for 96 hours assayed using MTT. Data = mean  $\pm$  standard deviation.  $n = 3$ . (C) Differentiated SH-SY5Y cells (Day 14) were stained with MAP2 antibody (red) and DAPI (blue). Cells were exposed to various concentrations of Pb prior to the initiation of differentiation. Scale bar = 50  $\mu\text{m}$  (D) A bar plot showing relative MAP2 expression levels in Pb-naïve and treated cells. (E) Neurite length of differentiated SH-SY5Y neurons that have been exposed to Pb of varying doses. In (D) and (E),  $n > 300$  cells. N.S.: no significance ( $p > 0.05$ ). \* [=]  $p < 0.05$ , \*\*\* [=]  $p < 0.001$ . Data = mean  $\pm$  standard error.

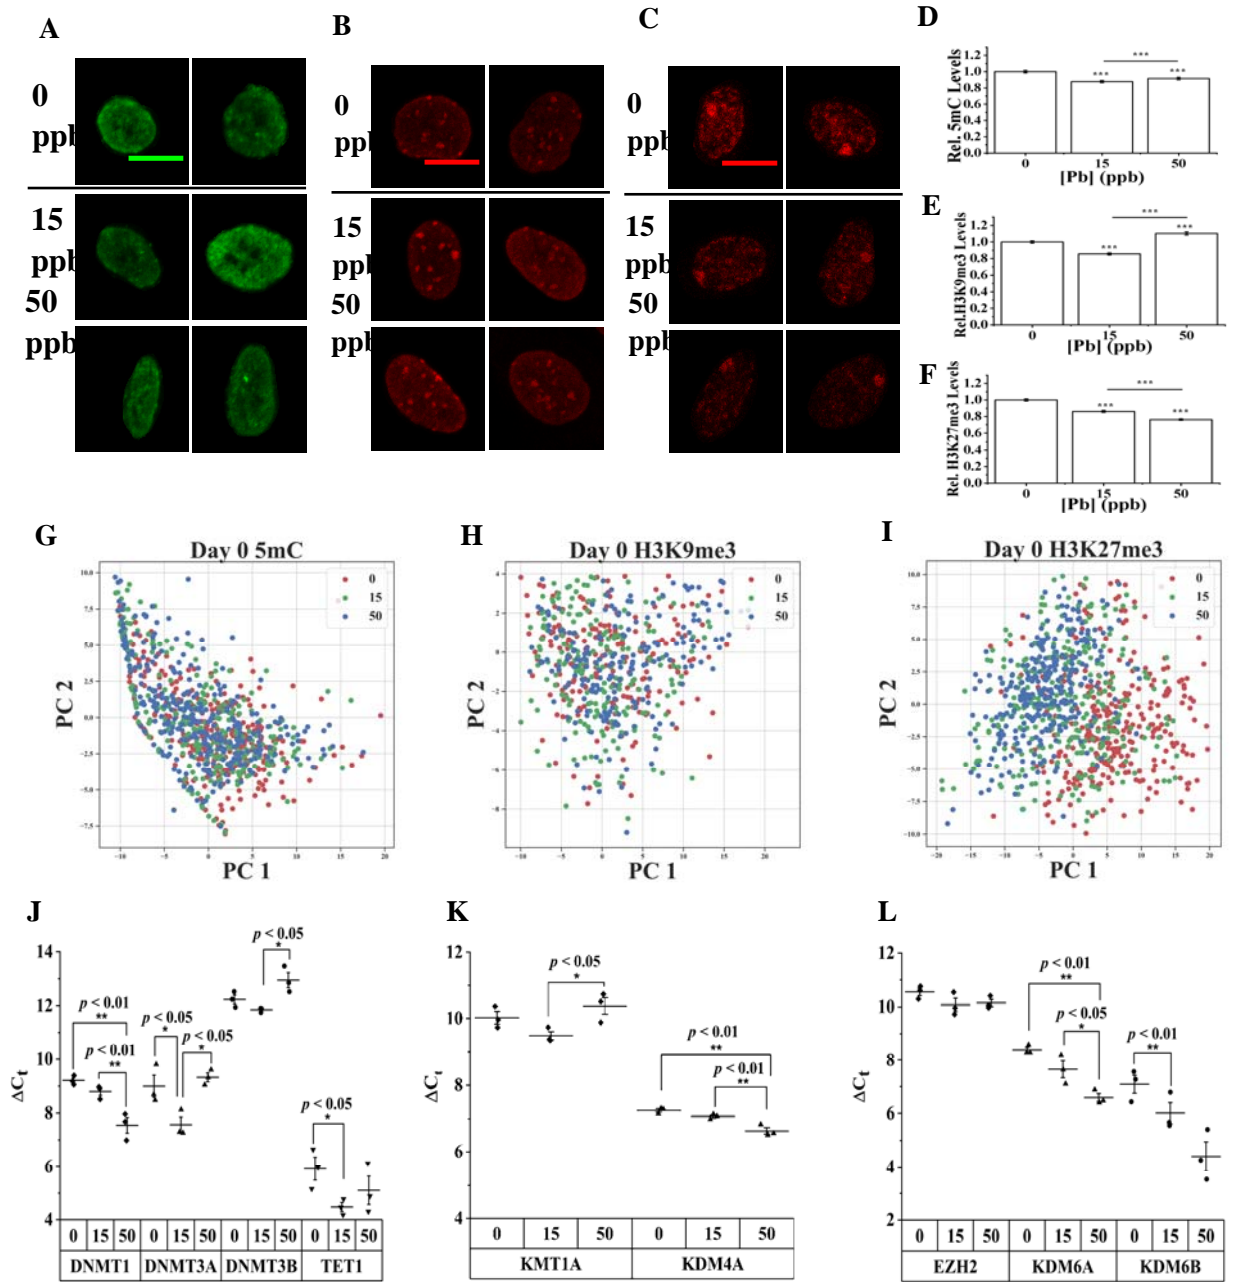

**Fig.2** (A-C) 2D stacked confocal images of undifferentiated SH-SY5Y cells stained for (A) 5mC, (B) H3K9me3, and (C) H3K27me3 after 96 hrs exposure to Pb of varying doses. Scale bar = 10 μm. (D-F) Relative changes in epigenetic modifications, namely (D) 5mC, (E) H3K9me3 and (F) H3K27me3 after exposing to Pb of varying doses. Data = mean ± standard error. n > 500 cells. \*\*\* [=] p < 0.001. (G-I) Principal component analysis of texture features. Principal component 1 and 2 (PC1 and PC2, respectively) were selected as the axes explaining most of the data variance. (G) 5mC, (H) H3K9me3, (I) H3K27me3. (J-L) Expression levels of mRNA coding for epigenetic writer and erasers, assessed immediately after 96 hours of exposure to Pb. Data are presented as the mean difference in cycle threshold (Ct) between gene of interest and β-actin. Error bars represent standard deviation. (J). Enzymes responsible for 5mC, namely DNMT1, DNMT3A, DNMT3B, and TET1. (K). Enzymes that are highly specific for H3K9me3, namely KMT1A and KDM4A. (L). Enzymes that are highly specific for H3K27me3, namely EZH2, KDM6A and KDM6B. Data = mean ± standard deviation. n > 3. \* [=] p

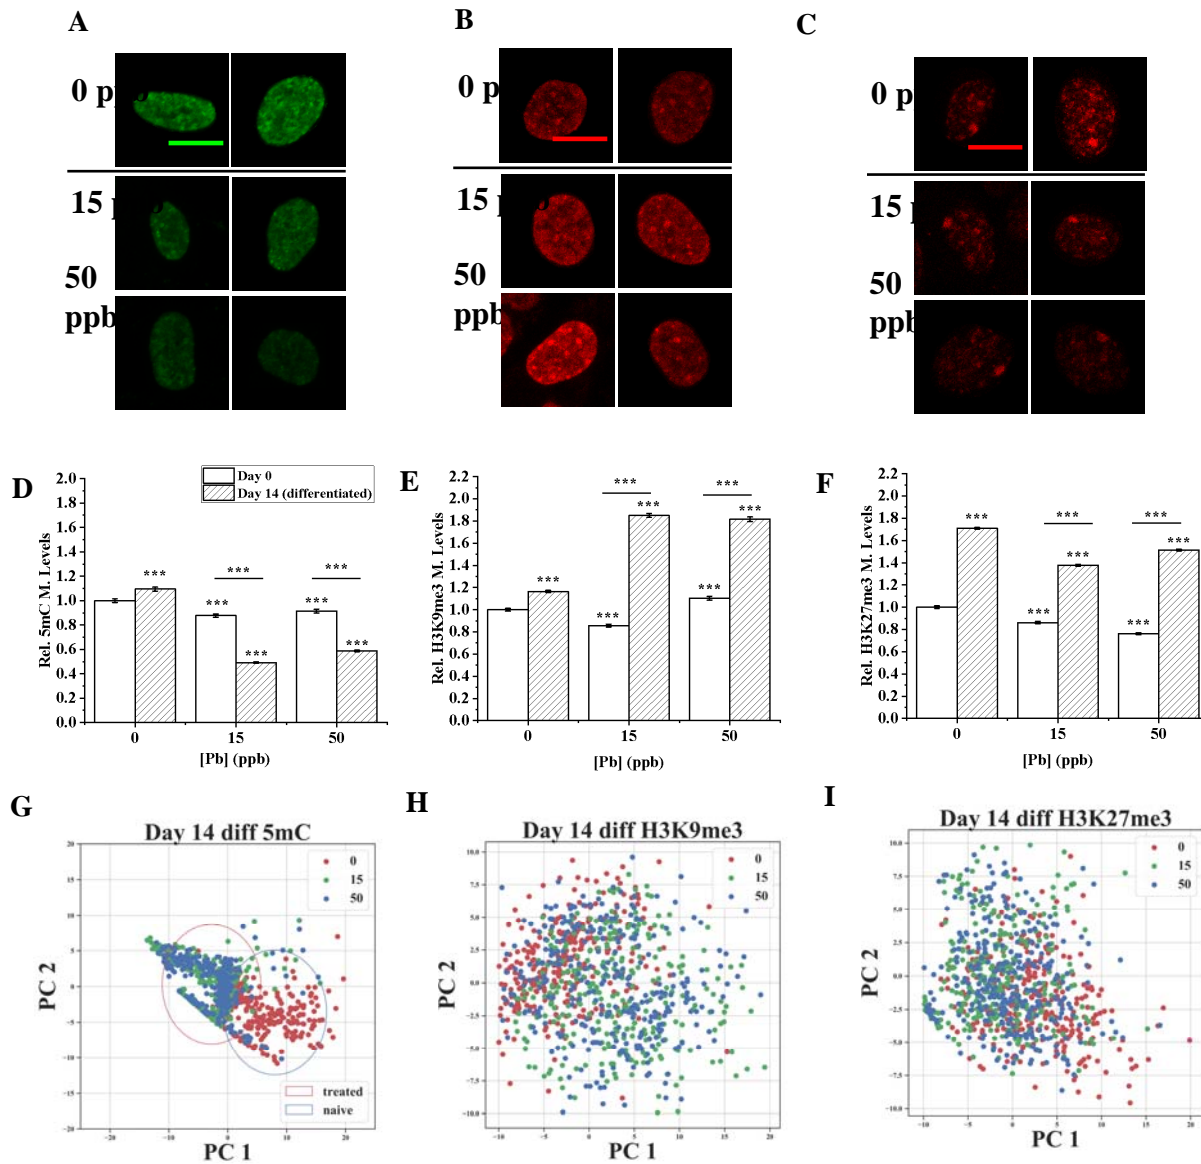

**Fig.3** (A-C) 2D stacked confocal images of SH-SY5Y cells stained for (A) 5mC, (B) H3K9me3, and (C) H3K27me3 after 96 hrs exposure to Pb, removal of Pb by medium swapping and completion of differentiation. Scale bar = 10  $\mu$ m. (D-F) Relative changes in epigenetic modifications, namely (D) 5mC, (E) H3K9me3 and (F) H3K27me3 after exposing to Pb of varying doses on Day 0 and Day 14 (after differentiation). All data are normalized to fluorescent intensity of untreated cells observed on Day 0. Data = mean  $\pm$  standard error.  $n > 500$  cells. \*\*\*[=]  $p < 0.001$ . (G-I) Principal component analysis of image pattern features. Principal component 1 and 2 (PC1 and PC2, respectively) were selected as the axes explaining most of the data variance. (G) 5mC, (H) H3K9me3, (I) H3K27me3.

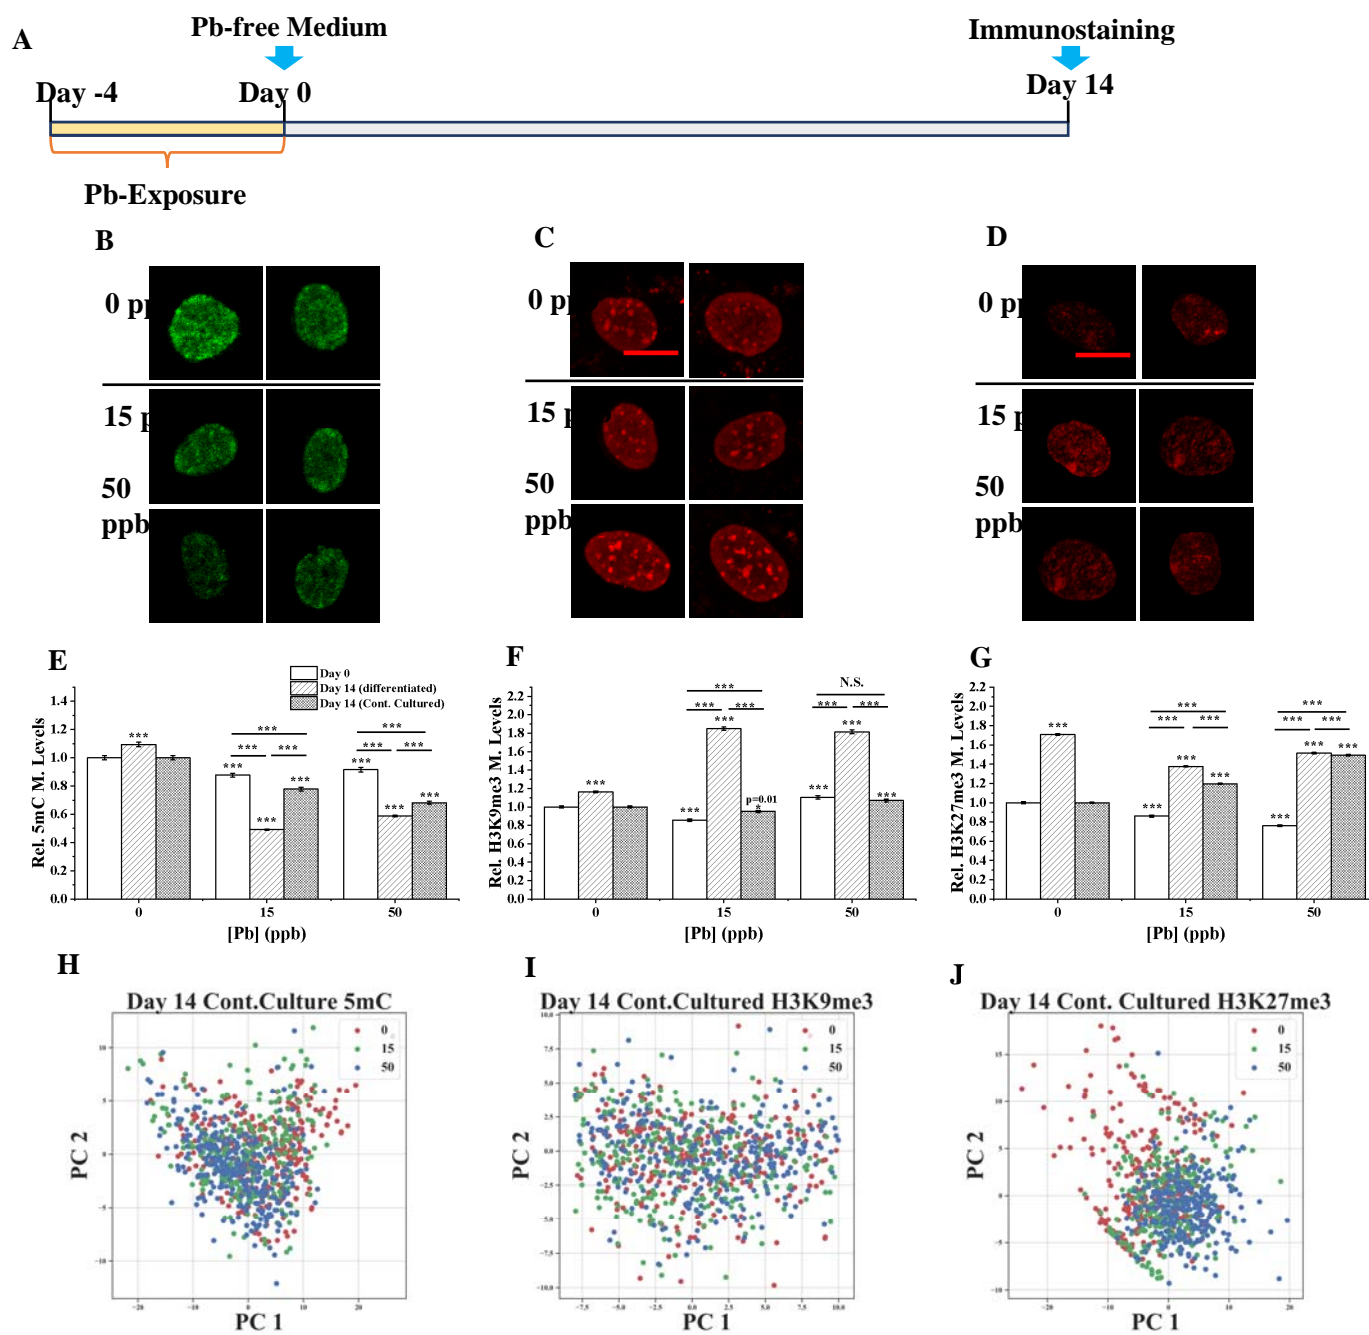

**Fig.4** (A) A schematic illustration of the exposure and continuous culturing timeline for SH-SY5Y cells. (B-D) 2D projected immunostaining images of Pb exposed SH-SY5Y cells relaxed in Pb-free medium for 14 days (B) 5mC, (C) H3K9me3, (D) H3K27me3. Scale bar = 10  $\mu$ m. (E-F) Bar graph demonstrating the relative changes in epigenetic modifications, (E) 5mC, (F) H3K9me3 and (G) H3K27me, after exposure to Pb<sup>2+</sup> quantified at different time and conditions: day 0, day 14 with differentiation, and day 14 without differentiation. All data are normalized to fluorescent intensity of untreated cells observed on Day 0. Data are represented as mean  $\pm$  standard error.  $n > 500$  cells. Asterisks above the column indicate significance relative to the control, N.S.: no significance ( $p > 0.05$ ), \*\*\*[=]  $p < 0.001$ , (H-J) Principal component analysis for image pattern features after continuous culturing. Principal component 1 and 2 (PC1 and PC2, respectively) were selected as the axes explaining most of the data variance. (H) 5mC, (I) H3K9me3, (J) H3K27me3.

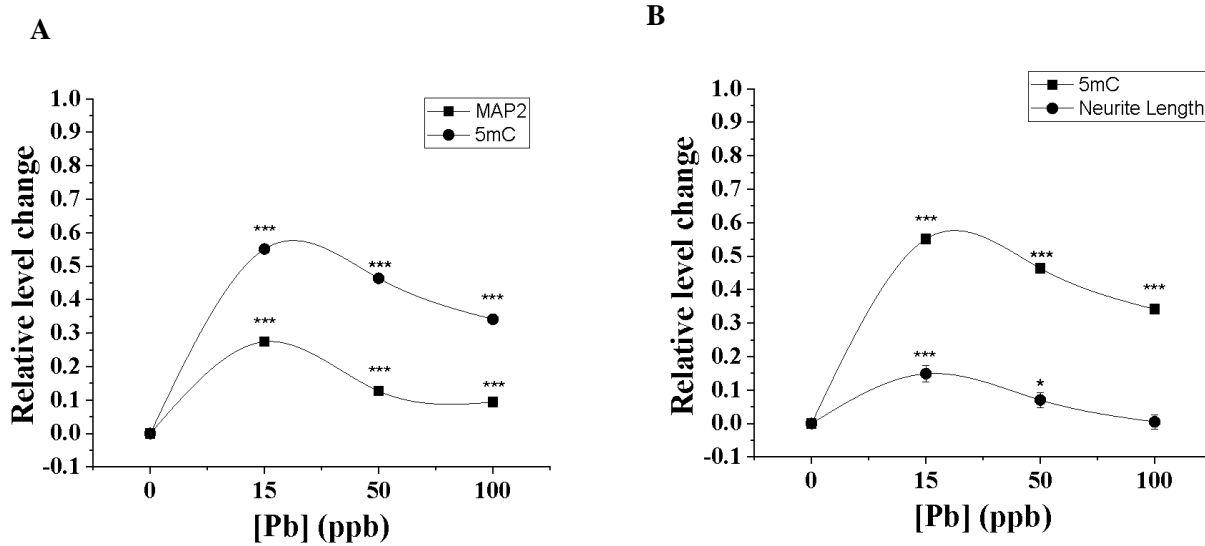

**Fig.5 (A)** Relative trends of changes in 5mC modification levels and MAP2 expressions on Day 14. Trends are positively correlated (Pearson's correlation = 0.9998). **(B)** Relative trends of changes in 5mC modification levels and Neurite length on Day 14. Trends are positively correlated (Pearson's correlation = 0.9891). An extra treatment concentration of 100ppb was added to enhance statistical power. 5mC modification levels, neurite length and MAP2 expression levels were quantified as described above. All data are normalized to untreated group. Data = Mean  $\pm$  S.E.  $n > 500$  cells. \*\*\*[=]  $p < 0.001$ .
